# Supplementary material
Source: PubMed Central journal article supplement (PMC3712000)
Supplement: cam-7-325-s01.pdf [file cam-7-325-s01.pdf]

## **Supplemental Material to:**

**Giovanni Marchetti, Adèle De Arcangelis,  
Véronique Pfister, and Elisabeth Georges-Labouesse**

**$\alpha$ 6 integrin subunit regulates cerebellar development**

**Cell Adhesion & Migration 2013; 7 (3)**

**<http://dx.doi.org/10.4161/cam.25140>**

**<http://www.landesbioscience.com/journals/celladhesion/article/25140/>**

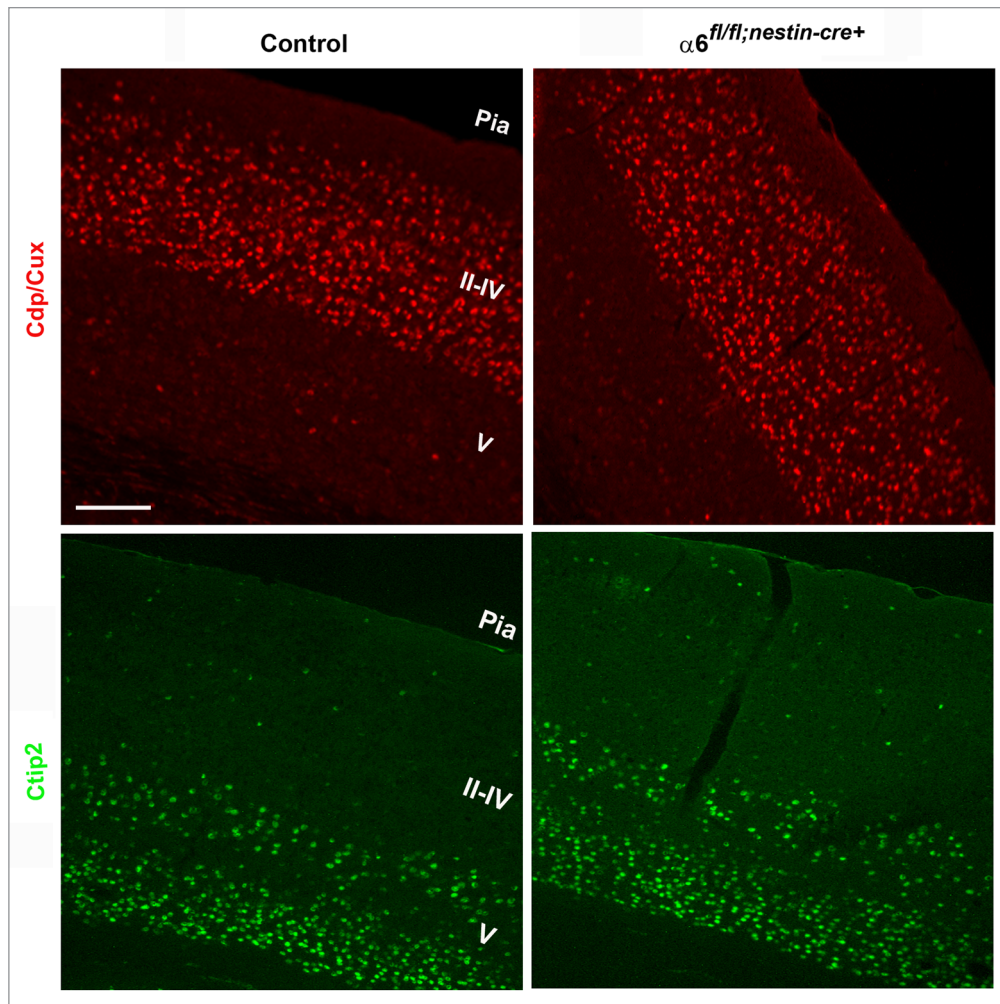

**Figure S1.** Normal cortical lamination in  $\alpha 6^{fl/fl}; nestin-Cre$  mice. Immunostaining for cortical layer-specific markers Cdp/Cux (red) and Ctjp2 (green) on P21 coronal sections of control and mutant cerebral cortex. Neurons in layers II-IV expressed Cdp/Cux, while neurons in layer V expressed Ctjp2. No differences in cortical laminar organization were observed comparing the control and mutant brains. Scale bar, 100  $\mu$ m.

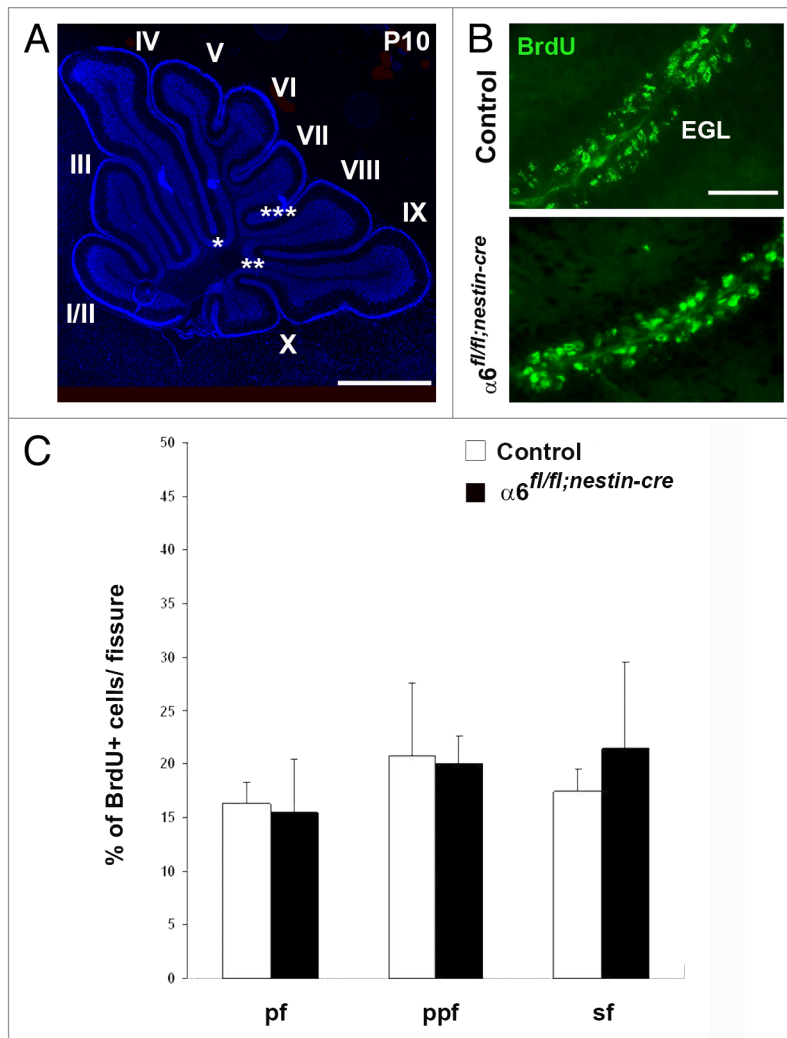

**Figure S2.** Granule cell precursor proliferation is not affected in the  $\alpha 6^{fl/fl}; nestin-Cre$  mice. **(A)** Sagittal sections of P10 mouse cerebellum stained with DAPI. The asterisks indicate the primary fissure (pf, \*), the secondary fissure (sf, \*\*), and prepyramidal fissure (ppf, \*\*\*). Scale bar, 200  $\mu$ m. **(B)** Mice were injected with BrdU and sacrificed 2 h later. Representative sagittal sections of P10 control and mutant cerebellum stained with BrdU antibody. Scale bar, 40  $\mu$ m. **(C)** Quantitative analysis of BrdU incorporation at P10. The quantification of the BrdU incorporation was performed within the fastest growing folia, respectively pf (control: 16.3  $\pm$  3.4%; mutant: 15.5  $\pm$  6.9%), sf (control: 17.5  $\pm$  3.5%; mutant: 21.4  $\pm$  11.5%), and ppf (control: 20.7  $\pm$  11.8%; mutant: 20  $\pm$  3.6%) fissures, where the proliferation rate is presumably the highest. Three sections were counted per animal (3 controls and 3 mutants). Histogram depicting the percentage of BrdU-positive cells to total DAPI-positive cells in the fissure indicated in (A). No statistically significant difference was detected in the number of BrdU-positive cells between control and mutant animals in all three fissures. Error bars indicate the SD. EGL, external granular layer.
